# Supplementary material for: Differential Sensitivity Analysis for Resistant Malignancies (DISARM) Identifies Common Candidate Therapies across Platinum-Resistant Cancers
Source: Oxford University Press journal article supplement (doi:10.1158/1078-0432.ccr-18-1129), 2018-09-26
Supplement: 10780432ccr181129-sup-200050_2_supp_5021611_pyyzl0.xlsx [file 10780432ccr181129-sup-200050_2_supp_5021611_pyyzl0.xlsx]

## Sheet: Supplementary Table S1
Supplementary Table S1: Shared mRNA biomarkers predicting PI3K inhibitor sensitivity in SCLC
Gene	Shared Between	Fold Change (mean)
ADCY2	GSK-2126458,PF-04691502,BEZ-235,GDC-0941	-1.92
BAI3	GSK-2126458,PF-04691502,BEZ-235,GDC-0941	-2.23
CAMK1D	GSK-2126458,PF-04691502,BEZ-235,GDC-0941	-1.68
CAMK2N1	GSK-2126458,PF-04691502,BEZ-235,GDC-0941	-1.92
CD81	GSK-2126458,PF-04691502,BEZ-235,GDC-0941	1.93
KDELR3	GSK-2126458,PF-04691502,BEZ-235,GDC-0941	1.74
NKX2-1	GSK-2126458,PF-04691502,BEZ-235,GDC-0941	-1.79
SHISA2	GSK-2126458,PF-04691502,BEZ-235,GDC-0941	-1.7
SLC16A1	GSK-2126458,PF-04691502,BEZ-235,GDC-0941	1.64
SYK	GSK-2126458,PF-04691502,BEZ-235,GDC-0941	-2.04
TRIB2	GSK-2126458,PF-04691502,BEZ-235,GDC-0941	-1.86

## Sheet: Supplementary Table S2
Supplementary Table S2: Shared protein biomarkers predicting PI3K inhibitor sensitivity in SCLC
Protein	Shared Between	Fold Change (mean)
VEGFR2	GSK-2126458,PF-04691502,BEZ-235,GDC-0941	-1.37
TTF1	GSK-2126458,BEZ-235,GDC-0941	-3.26
cMyc pT58	GSK-2126458,GDC-0941	1.57
cMyc	GSK-2126458,GDC-0941	2.2
eEF2K	GSK-2126458,PF-04691502	1.69
MSH2	GSK-2126458,GDC-0941	-1.14
Src	GSK-2126458,PF-04691502	-1.49
FOXO1 pT24	PF-04691502,BEZ-235	-1.27
PLK1	PF-04691502,GDC-0941	1.31

## Sheet: Supplementary Table S3
Supplementary Table S3: Shared mRNA biomarkers predicting AURKA inhibitor sensitivity in SCLC
Gene	Shared Between	Fold Change (mean)
AASS	AS-703569,CYC-116	1.89
ABCC4	AS-703569,CYC-116	2.19
ABCC9	AS-703569,CYC-116	1.62
ABLIM2	AS-703569,CYC-116	-1.59
ACTL6B	AS-703569,CYC-116	-1.57
ADAMTS3	AS-703569,CYC-116	1.62
ADCY2	AS-703569,CYC-116	-1.76
ADCYAP1	AS-703569,CYC-116	-3.31
AK4	AS-703569,CYC-116	1.79
AKD1	AS-703569,CYC-116	-2.31
AKNAD1	AS-703569,CYC-116	1.55
ALDH18A1	AS-703569,CYC-116	1.55
APOD	AS-703569,CYC-116	-2.04
ASCL1	AS-703569,CYC-116	-6.07
ATP1B1	AS-703569,CYC-116	-1.69
ATP8A2	AS-703569,CYC-116	-3.12
BAI3	AS-703569,CYC-116	-1.9
BCL2	AS-703569,CYC-116	-1.59
BMP8A	AS-703569,CYC-116	-1.86
BMP8B	AS-703569,CYC-116	-1.76
C11orf63	AS-703569,CYC-116	-1.91
C1QBP	AS-703569,CYC-116	1.53
C2orf15	AS-703569,CYC-116	-1.65
C3orf15	AS-703569,CYC-116	-1.7
C4orf34	AS-703569,CYC-116	-1.73
C7orf46	AS-703569,CYC-116	-1.71
C9orf64	AS-703569,CYC-116	-1.51
CA12	AS-703569,CYC-116	1.65
CA8	AS-703569,CYC-116	-1.55
CACHD1	AS-703569,CYC-116	1.92
CACNA1A	AS-703569,CYC-116	-2.03
CACNA1D	AS-703569,CYC-116	-1.58
CACNA1E	AS-703569,CYC-116	-1.67
CADPS2	AS-703569,CYC-116	-2.15
CAMK1D	AS-703569,CYC-116	-1.96
CAMK2B	AS-703569,CYC-116	-1.75
CAMK2N1	AS-703569,CYC-116	-1.9
CCDC30	AS-703569,CYC-116	-1.82
CCNA1	AS-703569,CYC-116	-2.33
CCND1	AS-703569,CYC-116	2
CCNE2	AS-703569,CYC-116	-1.77
CD24	AS-703569,CYC-116	-2.15
CDKN2C	AS-703569,CYC-116	-1.56
CEACAM5	AS-703569,CYC-116	-3.53
CEACAM6	AS-703569,CYC-116	-2.75
CHGA	AS-703569,CYC-116	-1.63
CLDN3	AS-703569,CYC-116	-1.66
CLDN4	AS-703569,CYC-116	-2.25
CNTN4	AS-703569,CYC-116	-1.54
CNTNAP5	AS-703569,CYC-116	-2.09
CPE	AS-703569,CYC-116	-1.69
CPM	AS-703569,CYC-116	-1.81
CSDA	AS-703569,CYC-116	2.27
CSMD2	AS-703569,CYC-116	-1.53
CSRP1	AS-703569,CYC-116	-2.09
CXCR4	AS-703569,CYC-116	-1.78
CYBRD1	AS-703569,CYC-116	2.28
CYFIP1	AS-703569,CYC-116	1.55
DDC	AS-703569,CYC-116	-2.46
DGKB	AS-703569,CYC-116	-2.14
DIRAS2	AS-703569,CYC-116	-2.24
DNER	AS-703569,CYC-116	-2.42
DOCK1	AS-703569,CYC-116	1.82
ELOVL6	AS-703569,CYC-116	1.66
EMP3	AS-703569,CYC-116	2.03
ENTPD3	AS-703569,CYC-116	-1.68
EPHA5	AS-703569,CYC-116	1.61
EPS8	AS-703569,CYC-116	-1.56
ERO1LB	AS-703569,CYC-116	-2.7
ETV6	AS-703569,CYC-116	-1.65
F2R	AS-703569,CYC-116	1.74
FAM111B	AS-703569,CYC-116	-1.77
FAM13A	AS-703569,CYC-116	-1.7
FAM3B	AS-703569,CYC-116	-2.63
FASN	AS-703569,CYC-116	1.56
FBXO17	AS-703569,CYC-116	1.74
FKBP14	AS-703569,CYC-116	1.79
FOXA1	AS-703569,CYC-116	-1.69
FRAS1	AS-703569,CYC-116	-1.76
FRY	AS-703569,CYC-116	-1.93
FSTL5	AS-703569,CYC-116	1.8
FYN	AS-703569,CYC-116	-1.61
GCH1	AS-703569,CYC-116	-1.79
GCNT1	AS-703569,CYC-116	-1.82
GLT25D2	AS-703569,CYC-116	1.63
GLYATL2	AS-703569,CYC-116	-1.94
GPR56	AS-703569,CYC-116	-1.71
GPX8	AS-703569,CYC-116	1.75
GRP	AS-703569,CYC-116	-5.44
HGF	AS-703569,CYC-116	2.06
HHIP	AS-703569,CYC-116	1.6
HK2	AS-703569,CYC-116	1.59
HMGA2	AS-703569,CYC-116	1.89
HOXB2	AS-703569,CYC-116	-2.79
HOXB3	AS-703569,CYC-116	-1.7
HOXB5	AS-703569,CYC-116	-2.13
HOXB8	AS-703569,CYC-116	-1.51
HOXB9	AS-703569,CYC-116	-2.23
ICA1	AS-703569,CYC-116	-1.73
IGF2BP1	AS-703569,CYC-116	1.96
IGFBP5	AS-703569,CYC-116	-2.96
KCND3	AS-703569,CYC-116	-1.97
KCNH7	AS-703569,CYC-116	-2.19
KCNH8	AS-703569,CYC-116	-1.82
KCNK17	AS-703569,CYC-116	-1.78
KCNMA1	AS-703569,CYC-116	-2.09
KCNMB2	AS-703569,CYC-116	-2.28
KIAA1244	AS-703569,CYC-116	-1.74
KIF13A	AS-703569,CYC-116	1.98
KIT	AS-703569,CYC-116	-2.84
KITLG	AS-703569,CYC-116	-1.93
LAMP3	AS-703569,CYC-116	-1.78
LASS4	AS-703569,CYC-116	-1.64
LAYN	AS-703569,CYC-116	1.61
LIFR	AS-703569,CYC-116	-2.52
LIN28B	AS-703569,CYC-116	1.7
LMO3	AS-703569,CYC-116	-4.69
LYPD1	AS-703569,CYC-116	-1.83
MACF1	AS-703569,CYC-116	-1.87
MAML2	AS-703569,CYC-116	1.88
MBIP	AS-703569,CYC-116	-1.79
MCC	AS-703569,CYC-116	1.68
MFSD6	AS-703569,CYC-116	-1.63
MGAT4A	AS-703569,CYC-116	-1.86
MIR137	AS-703569,CYC-116	1.77
MUC15	AS-703569,CYC-116	-3.64
MYC	AS-703569,CYC-116	3.95
MYH10	AS-703569,CYC-116	1.61
MYO1D	AS-703569,CYC-116	-2.17
NAV2	AS-703569,CYC-116	-2.13
NDRG1	AS-703569,CYC-116	-2.35
NELL1	AS-703569,CYC-116	-2.72
NFIB	AS-703569,CYC-116	-1.82
NKAIN2	AS-703569,CYC-116	-3.24
NKX2-1	AS-703569,CYC-116	-1.8
NME4	AS-703569,CYC-116	1.63
NOB1	AS-703569,CYC-116	1.62
NOVA1	AS-703569,CYC-116	-1.85
NPTX1	AS-703569,CYC-116	-1.83
NR0B2	AS-703569,CYC-116	-1.93
NRCAM	AS-703569,CYC-116	-2.02
NRIP3	AS-703569,CYC-116	-1.57
NRXN1	AS-703569,CYC-116	-1.99
P2RX5	AS-703569,CYC-116	1.63
PCLO	AS-703569,CYC-116	-1.88
PCOLCE2	AS-703569,CYC-116	1.68
PCSK1	AS-703569,CYC-116	-3.07
PCSK2	AS-703569,CYC-116	-2.89
PHYHIPL	AS-703569,CYC-116	-2.09
PLA2G4A	AS-703569,CYC-116	1.83
PLBD1	AS-703569,CYC-116	1.71
PLTP	AS-703569,CYC-116	1.79
PLXNA2	AS-703569,CYC-116	-1.75
PPARGC1A	AS-703569,CYC-116	-1.96
PRAME	AS-703569,CYC-116	2.31
PREX1	AS-703569,CYC-116	1.63
PRICKLE1	AS-703569,CYC-116	1.53
PRKCH	AS-703569,CYC-116	-1.65
PRRG1	AS-703569,CYC-116	1.82
PTPN13	AS-703569,CYC-116	2.23
PTPN14	AS-703569,CYC-116	2.66
PTPRN2	AS-703569,CYC-116	-1.69
PYGL	AS-703569,CYC-116	1.86
QPCT	AS-703569,CYC-116	-1.93
QPRT	AS-703569,CYC-116	1.72
RAB3B	AS-703569,CYC-116	-2.49
RAI14	AS-703569,CYC-116	2.11
RCN1	AS-703569,CYC-116	2.05
REST	AS-703569,CYC-116	1.77
RET	AS-703569,CYC-116	-2.09
RGS10	AS-703569,CYC-116	1.53
RGS7	AS-703569,CYC-116	-2.12
RIMS2	AS-703569,CYC-116	-1.91
RPP40	AS-703569,CYC-116	1.58
RUNX1T1	AS-703569,CYC-116	-1.86
SALL4	AS-703569,CYC-116	1.56
SCGN	AS-703569,CYC-116	-4.22
SEC11C	AS-703569,CYC-116	-2.3
SEMA3A	AS-703569,CYC-116	2.4
SEZ6L	AS-703569,CYC-116	-2.12
SGCE	AS-703569,CYC-116	-1.6
SGK3	AS-703569,CYC-116	-1.76
SLC2A3	AS-703569,CYC-116	1.81
SLC37A1	AS-703569,CYC-116	-1.59
SLC41A2	AS-703569,CYC-116	-1.56
SLFN13	AS-703569,CYC-116	-2.73
SMOC2	AS-703569,CYC-116	-1.86
SNCAIP	AS-703569,CYC-116	-2.01
SORBS2	AS-703569,CYC-116	-1.62
SORL1	AS-703569,CYC-116	-1.91
ST18	AS-703569,CYC-116	-2.29
ST8SIA4	AS-703569,CYC-116	-1.88
ST8SIA5	AS-703569,CYC-116	-1.76
STK32A	AS-703569,CYC-116	-2.28
SUCLG2	AS-703569,CYC-116	1.63
SV2B	AS-703569,CYC-116	-3.01
SYK	AS-703569,CYC-116	-1.93
SYT13	AS-703569,CYC-116	-2.24
SYT17	AS-703569,CYC-116	-1.74
TAGLN2	AS-703569,CYC-116	1.97
TFCP2L1	AS-703569,CYC-116	-2.05
TFF3	AS-703569,CYC-116	-2.52
TGIF2	AS-703569,CYC-116	2.29
TMEM116	AS-703569,CYC-116	-1.5
TMEM163	AS-703569,CYC-116	-1.69
TRIB2	AS-703569,CYC-116	-1.7
TRIM9	AS-703569,CYC-116	-1.65
TSPAN1	AS-703569,CYC-116	-1.96
TSPAN12	AS-703569,CYC-116	-1.65
TSPAN6	AS-703569,CYC-116	2.1
TYRO3	AS-703569,CYC-116	1.55
UNC80	AS-703569,CYC-116	-1.74
VIM	AS-703569,CYC-116	2.37
VSTM2A	AS-703569,CYC-116	-1.57
WFDC2	AS-703569,CYC-116	-1.68
WWC2	AS-703569,CYC-116	1.71
ZACN	AS-703569,CYC-116	-1.64
ZBTB20	AS-703569,CYC-116	-1.83
ZC4H2	AS-703569,CYC-116	2.53
ZDHHC13	AS-703569,CYC-116	-1.64
ZIC1	AS-703569,CYC-116	1.83

## Sheet: Supplementary Table S4
Supplementary Table S4: Shared protein biomarkers predicting AURKA inhibitor sensitivity in SCLC
Protein	Shared Between	Fold Change (mean)
c-Kit	AS-703569,CYC-116	-2.27
cMyc pT58	AS-703569,CYC-116	1.73
cMyc	AS-703569,CYC-116	2.21
Nrf2	AS-703569,CYC-116	1.17
p70S6K	AS-703569,CYC-116	1.5
S6	AS-703569,CYC-116	1.2
TTF1	AS-703569,CYC-116	-3.1
Cdk7	AS-703569,CYC-116	1.21

## Sheet: Supplementary Table S5
Supplementary Table S5: Shared mRNA biomarkers predicting obatoclax sensitivity in LUAD and SCLC
Gene	Fold Change (LUAD)	Fold Change (SCLC)
ASCL1	1.42	6.36
C16ORF33	1.5	1.6
CALU	-1.36	-1.43
CCDC68	-2.27	-2.58
CP110	1.31	1.86
DCC1	1.53	1.42
FLJ13224	1.85	2.08
FTO	1.35	1.39
GDI2	-1.28	-1.2
GNRH1	1.95	2.32
GTF3C1	1.36	1.36
HAGH	1.27	1.4
IFT122	1.36	1.52
KCNK15	2.81	2.11
KIF22	1.38	1.3
LIG1	1.6	1.73
NDOR1	1.92	1.95
NUBP2	1.35	1.4
POLR3K	1.35	1.26
PPME1	1.32	1.57
PRDM1	-2.09	-2.05
PSMC3IP	1.25	1.74
PTPN21	-1.4	-1.74
RAD21	1.17	1.29
RAD51L1	-1.35	-1.67
SCGB1A1	1.97	1.97
SPINK2	2.4	2.2
TAF15	1.35	1.4
ZGPAT	1.49	1.33
ZNF672	1.26	1.48
ZNF764	1.36	1.37

## Sheet: Supplementary Table S6
Supplementary Table S6: DISARM-selected candidates from GDSC for cisplatin-resistant BLCA.
Tumor	Drug	Target	DISARM score	p-value
BLCA	AP-24534	ABL	3.26	<0.001
BLCA	Thapsigargin	ATPase	3.26	<0.001
BLCA	TW-37	BCL-2	3.27	<0.001
BLCA	Obatoclax	BCL-2	3.26	<0.001
BLCA	Midostaurin	c-KIT	3.26	<0.001
BLCA	Gefitinib	EGFR	3.26	<0.001
BLCA	BIBW2992	EGFR,HER2	3.26	<0.001
BLCA	Tipifarnib	FNTA	3.26	<0.001
BLCA	17-AAG	HSP90	3.26	<0.001
BLCA	JNK-9L	JNK	3.26	<0.001
BLCA	AZD8055	mTOR	3.26	<0.001
BLCA	FH535	Wnt	3.26	<0.001
BLCA	Doxorubicin	cytotoxic chemotherapy	3.26	<0.001
BLCA	Etoposide	cytotoxic chemotherapy	3.26	<0.001
BLCA	Gemcitabine	cytotoxic chemotherapy	3.26	<0.001
BLCA	Vinorelbine	cytotoxic chemotherapy	3.26	<0.001
BLCA	Vinblastine	cytotoxic chemotherapy	3.26	<0.001

## Sheet: Supplementary Table S7
Supplementary Table S7: DISARM-selected candidates from GDSC for cisplatin-resistant COAD.
Tumor	Drug	Target	DISARM score	p-value
COAD	Thapsigargin	ATPase	5.23	<1.0x10-7
COAD	Obatoclax	BCL-2	5.23	<1.0x10-7
COAD	AZD7762	CHK	5.5	<1.0x10-7
COAD	Midostaurin	c-KIT	5.23	<1.0x10-7
COAD	Gefitinib	EGFR	5.5	<1.0x10-7
COAD	BIBW2992	EGFR,HER2	5.5	<1.0x10-7
COAD	CEP-701	FLT3,JAK2,NTRK1,RET	5.5	<1.0x10-7
COAD	Tipifarnib	FNTA	5.23	<1.0x10-7
COAD	Vorinostat	HDAC	5.23	<1.0x10-7
COAD	Elesclomol	HSP70	5.5	<1.0x10-7
COAD	17-AAG	HSP90	5.5	<1.0x10-7
COAD	JNK-9L	JNK	5.23	<1.0x10-7
COAD	RDEA119	MEK	5.23	<1.0x10-7
COAD	AZD8055	mTOR	5.23	<1.0x10-7
COAD	Bryostatin 1	PRKC	5.23	<1.0x10-7
COAD	FH5351	Wnt	5.23	<1.0x10-7
COAD	Vinblastine	cytotoxic chemotherapy	5.5	<1.0x10-7
COAD	Etoposide	cytotoxic chemotherapy	5.23	<1.0x10-7
COAD	Vinorelbine	cytotoxic chemotherapy	5.23	<1.0x10-7
COAD	Docetaxel	cytotoxic chemotherapy	5.23	<1.0x10-7
COAD	Methotrexate	cytotoxic chemotherapy	5.23	<1.0x10-7
COAD	Doxorubicin	cytotoxic chemotherapy	5.23	<1.0x10-7
COAD	Gemcitabine	cytotoxic chemotherapy	5.23	<1.0x10-7
COAD	Bleomycin	cytotoxic chemotherapy	5.23	<1.0x10-7
COAD	Epothilone B	cytotoxic chemotherapy	5.23	<1.0x10-7
COAD	Shikonin	herbal	5.23	<1.0x10-7

## Sheet: Supplementary Table S8
Supplementary Table S8: DISARM-selected candidates from GDSC for cisplatin-resistant ESCA.
Tumor	Drug	Target	DISARM score	p-value
ESCA	TW-37	BCL-2	3.66	<0.001
ESCA	AZD7762	CHK	4.02	<1.0x10-4
ESCA	BIBW2992	EGFR,HER2	4.02	<1.0x10-4
ESCA	CEP-701	FLT3,JAK2,NTRK1,RET	4.02	<1.0x10-4
ESCA	Tipifarnib	FNTA	4.02	<1.0x10-4
ESCA	AUY922	HSP90	4.02	<1.0x10-4
ESCA	X17-AAG	HSP90	3.66	<0.001
ESCA	BMS-754807	IGF1R	4.02	<1.0x10-4
ESCA	JNK-9L	JNK	4.02	<1.0x10-4
ESCA	PD-0325901	MEK	3.66	<0.001
ESCA	AZD8055	mTOR	3.66	<0.001
ESCA	BEZ235	mTOR,PI3K	3.66	<0.001
ESCA	Bryostatin 1	PRKC	4.02	<1.0x10-4
ESCA	Doxorubicin	cytotoxic chemotherapy	4.02	<1.0x10-4
ESCA	Gemcitabine	cytotoxic chemotherapy	4.02	<1.0x10-4
ESCA	Mitomycin C	cytotoxic chemotherapy	4.02	<1.0x10-4
ESCA	Vinorelbine	cytotoxic chemotherapy	4.02	<1.0x10-4
ESCA	Epothilone B	cytotoxic chemotherapy	4.02	<1.0x10-4
ESCA	Vinblastine	cytotoxic chemotherapy	4.02	<1.0x10-4
ESCA	Docetaxel	cytotoxic chemotherapy	4.02	<1.0x10-4
ESCA	Methotrexate	cytotoxic chemotherapy	4.02	<1.0x10-4
ESCA	Shikonin	herbal	4.02	<1.0x10-4

## Sheet: Supplementary Table S9
Supplementary Table S9: DISARM-selected candidates from GDSC for cisplatin-resistant HNSC.
Tumor	Drug	Target	DISARM score	p-value
HNSC	Thapsigargin	ATPase	3.66	<0.001
HNSC	Obatoclax	BCL-2	3.66	<0.001
HNSC	TW-37	BCL-2	3.66	<0.001
HNSC	AZD7762	CHK	3.66	<0.001
HNSC	Midostaurin	c-KIT	3.66	<0.001
HNSC	AUY922	HSP90	3.66	<0.001
HNSC	17-AAG	HSP90	3.29	<0.001
HNSC	BMS-754807	IGF1R	3.66	<0.001
HNSC	JNK-9L	JNK	3.66	<0.001
HNSC	RDEA119	MEK	3.29	<0.001
HNSC	PD-0325901	MEK	3.29	<0.001
HNSC	Temsirolimus	mTOR	3.66	<0.001
HNSC	AZD8055	mTOR	3.29	<0.001
HNSC	BEZ235	mTOR,PI3K	3.29	<0.001
HNSC	Bryostatin 1	PRKC	3.66	<0.001
HNSC	Doxorubicin	cytotoxic chemotherapy	3.66	<0.001
HNSC	Mitomycin C	cytotoxic chemotherapy	3.66	<0.001
HNSC	Vinorelbine	cytotoxic chemotherapy	3.66	<0.001
HNSC	Bleomycin	cytotoxic chemotherapy	3.66	<0.001
HNSC	Epothilone B	cytotoxic chemotherapy	3.66	<0.001
HNSC	Camptothecin	cytotoxic chemotherapy	3.66	<0.001
HNSC	Vinblastine	cytotoxic chemotherapy	3.66	<0.001

## Sheet: Supplementary Table S10
Supplementary Table S10: DISARM-selected candidates from GDSC for cisplatin-resistant LUAD.
Tumor	Drug	Target	DISARM score	p-value
LUAD	AP24534	ABL	5.75	<1.0x10-8
LUAD	Obatoclax	BCL-2	5.75	<1.0x10-8
LUAD	BIBW2992	EGFR,ERBB2	6.23	<1.0x10-9
LUAD	CEP-701	FLT3,JAK2,NTRK1,RET	6.23	<1.0x10-9
LUAD	AUY922	HSP90	5.75	<1.0x10-8
LUAD	BMS754807	IGF1R	5.75	<1.0x10-8
LUAD	Temsirolimus	mTOR	6.23	<1.0x10-9
LUAD	Bryostatin 1	PRKC	5.75	<1.0x10-8
LUAD	FH535	Wnt	5.75	<1.0x10-8
LUAD	Mitomycin C	cytotoxic chemotherapy	5.75	<1.0x10-8
LUAD	Shikonin	herbal	5.75	<1.0x10-8

[truncated: 4 more sheets: Supplementary Table S11, Supplementary Table S12, Supplementary Table S13, Supplementary Table S14]
